# Supplementary material for: Single-molecule visualization of stalled replication-fork rescue by the Escherichia coli Rep helicase
Source: PubMed Central journal article supplement (PMC10123100; doi:10.1093/nar/gkad186), 2023-03-20
Supplement: gkad186_supplemental_file.pdf [file gkad186_supplemental_file.pdf]

# **Single-molecule visualization of stalled replication-fork rescue by the *Escherichia coli* Rep helicase**

Kelsey S. Whinn<sup>1,2</sup>, Zhi-Qiang Xu<sup>1,2</sup>, Slobodan Jergic<sup>1,2</sup>, Nischal Sharma<sup>1,2</sup>, Lisanne M. Spenkelink<sup>1,2</sup>, Nicholas E. Dixon<sup>1,2</sup>, Antoine M. van Oijen<sup>1,2,\*</sup> and Harshad Ghodke<sup>1,2</sup>

<sup>1</sup> Molecular Horizons and School of Chemistry and Molecular Bioscience, University of Wollongong, Wollongong, New South Wales 2522, Australia

<sup>2</sup> Illawarra Health & Medical Research Institute, Wollongong, New South Wales 2522, Australia

\* To whom correspondence should be addressed. Tel: +61 2 4221 4780; Email: vanoijen@uow.edu.au

## **Supplementary Table S1: Nucleic acid substrates used in this study.**

| Experiment           | Substrate | Sequence                                                                                                                      |
|----------------------|-----------|-------------------------------------------------------------------------------------------------------------------------------|
| Trap dsDNA/<br>83mer | 83_S      | 5'-CAC ATG CTA TGA GCT GTT GCA ATC TCT CGT<br>ACA ATT AAT AGA CTG GAT GGT GGA TGA CAA<br>AGC TCT ACA CTA GAT ACT CAC AC-3'    |
|                      | 83_AS     | 3-bio-GTG TAC GAT ACT CGA CAA CGT TAG AGA<br>GCA TGT TAA TTA TCT GAC CTA CCA CCT ACT<br>GTT TCG AGA TGT GAT CTA TGA GTG TG-5' |
| gRNA                 | cgRNA1    | 5' - ACA AUU AAU AGA CUG GAU GG                                                                                               |
|                      | cgRNA3    | 5' - CAU UCC UGC AGC GAG UCC AU                                                                                               |
|                      | cgRNA4    | 5' - AAA CUC ACG UUA AGG GAU UU                                                                                               |
| Mismatch<br>gRNA     | gRNA80    | 5' - cac cUU AAU AGA CUG GAU GG                                                                                               |
|                      | gRNA60    | 5' - cac cgg ccU AGA CUG GAU GG                                                                                               |
|                      | gRNA40    | 5' - cac cgg ccg cuc CUG GAU GG                                                                                               |
|                      | gRNA20    | 5' - cac cgg ccg cuc agu uAU GG                                                                                               |

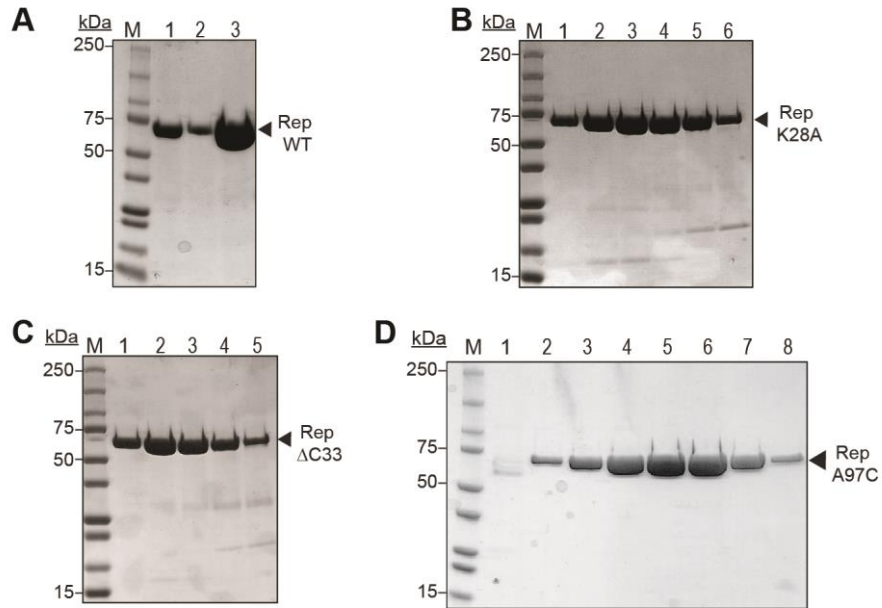

**Supplementary Figure S1:** Purification of Rep proteins using 5 mL HiTrap Heparin columns. Samples were analyzed on 4–20% SDS-PAGE gels. **(A)** Purification of His<sub>6</sub> Rep WT. Sample after purification on His-Trap column (lane 1), fractions of purified protein from Heparin column (lanes 2–3) used in this study. **(B)** Purification of His<sub>6</sub> Rep K28A. Samples from successive fractions (indicated by lane numbers 1–6). **(C)** Purification of His<sub>6</sub> Rep  $\Delta$ C33. Samples from successive fractions (indicated by lane numbers 1–5). **(D)** Purification of His<sub>6</sub> Rep A97C. Samples from column flow-through (lane 1), and successive fractions (indicated by lane numbers 2–8).

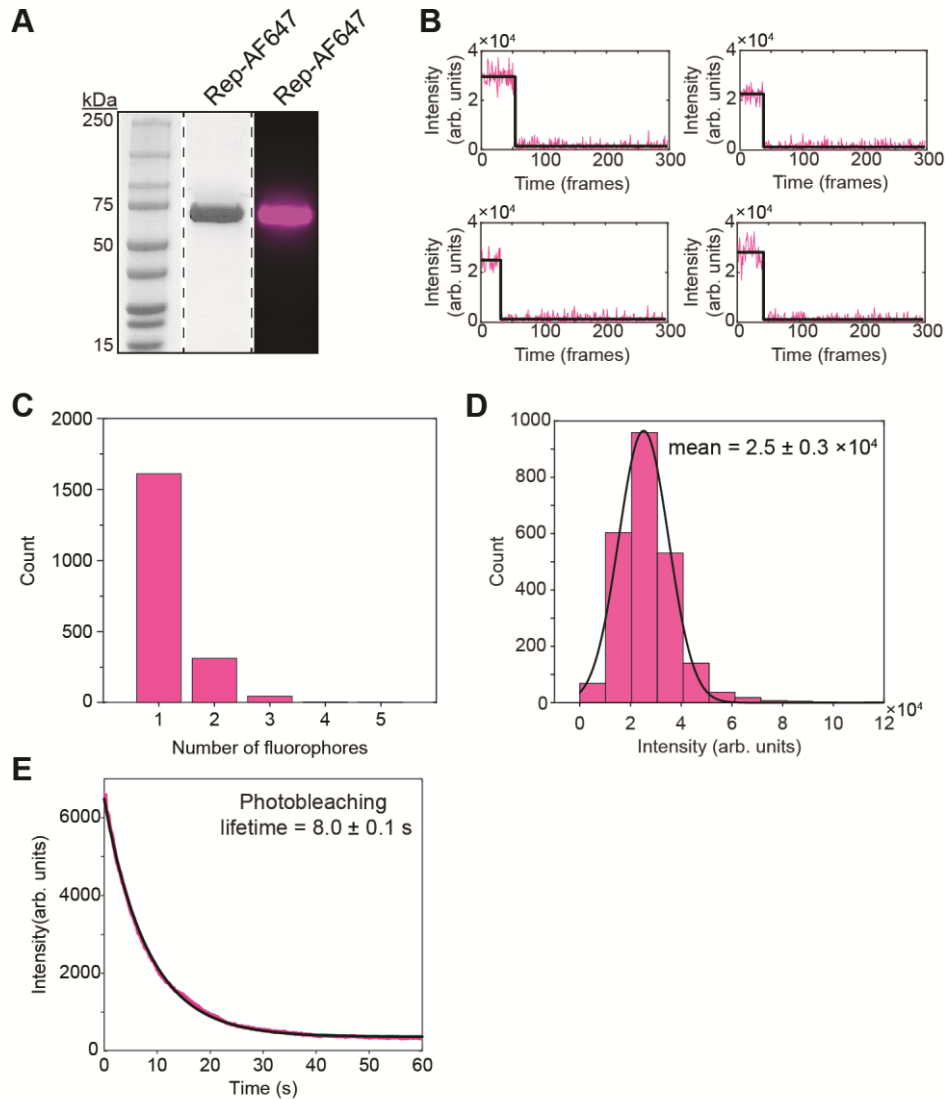

**Supplementary Figure S2:** Quantification of fluorescent labeling of Rep-AF647. **(A)** SDS-PAGE gel of purified Rep-AF647. Left and middle lanes are stained with Coomassie blue and imaged using a Bio-Rad Gel Doc XR. Right lane is unstained and Alexa Fluor 647 fluorescence imaged using an Amersham Imager 600. **(B)** Example trajectories of Rep proteins deposited on coverslip and subjected to photobleaching. Number of fluorophores per Rep monomer are detected by quantifying the single-molecule photobleaching steps using change point analysis (black line). **(C)** Distribution of the number of steps and therefore the number of fluorophores per monomer ( $n = 1483$ ). **(D)** Distribution of the step size of (B) was  $2.5 \pm 0.3 \times 10^4$  (mean  $\pm$  S.E.M.,  $n = 1483$ ). **(E)** Average photo-bleaching trajectory for Rep-AF647 ( $n = 1483$ ) at excitation power density of  $200 \text{ mW cm}^{-2}$ . From a fit with a single-exponential decay function (black line), a photo-bleaching lifetime of  $8.0 \pm 0.1$  s was obtained.

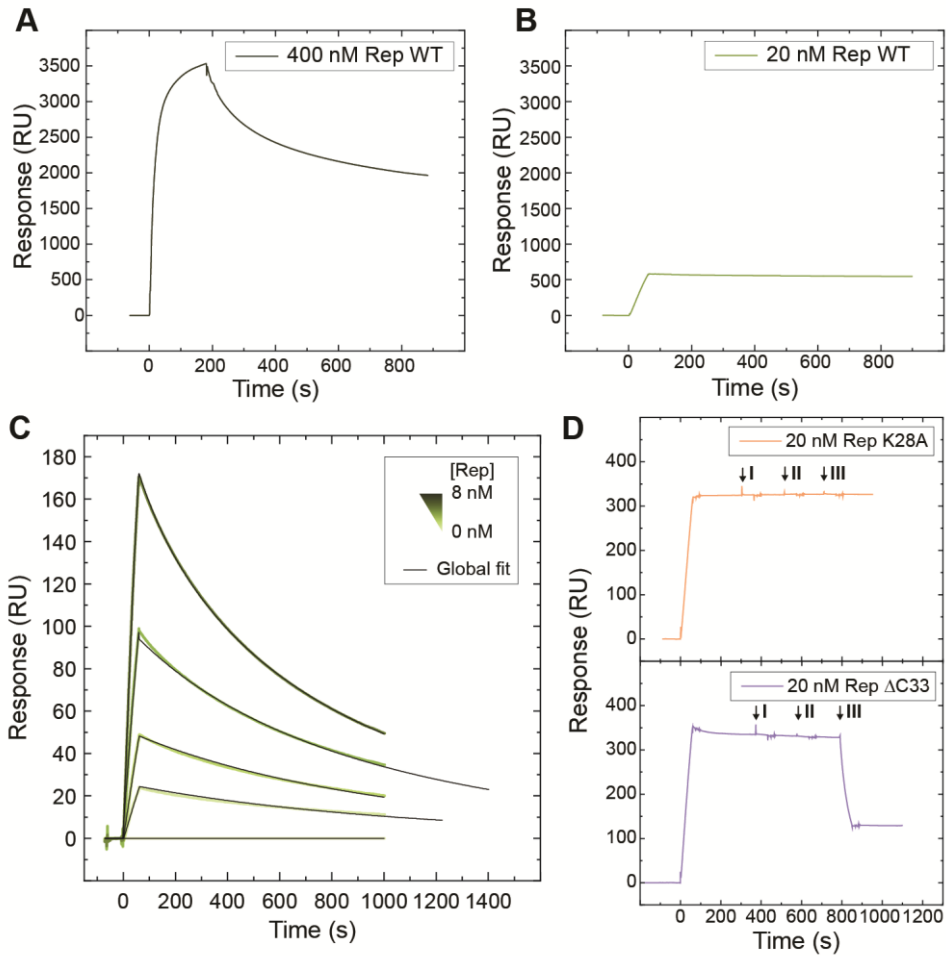

**Supplementary Figure S3:** Observations of Rep binding to DNA. SPR sensorgrams of 400 nM (**A**) and 20 nM (**B**) Rep WT binding to dT<sub>35</sub>. (**C**) Association (60 s) and dissociation of titrated (1–8 nM) Rep WT binding to dT<sub>15</sub> (global fitting of Rep binding (1:1 binding with mass transfer) shown in black yielded a  $K_D$  of approximately 500 pM). (**D**) 20 nM Rep K28A (orange – top) and 20 nM Rep  $\Delta$ C33 (purple – bottom) dissociation after injection of nucleotides AMP-PNP (I), ADP (II) and ATP (III).

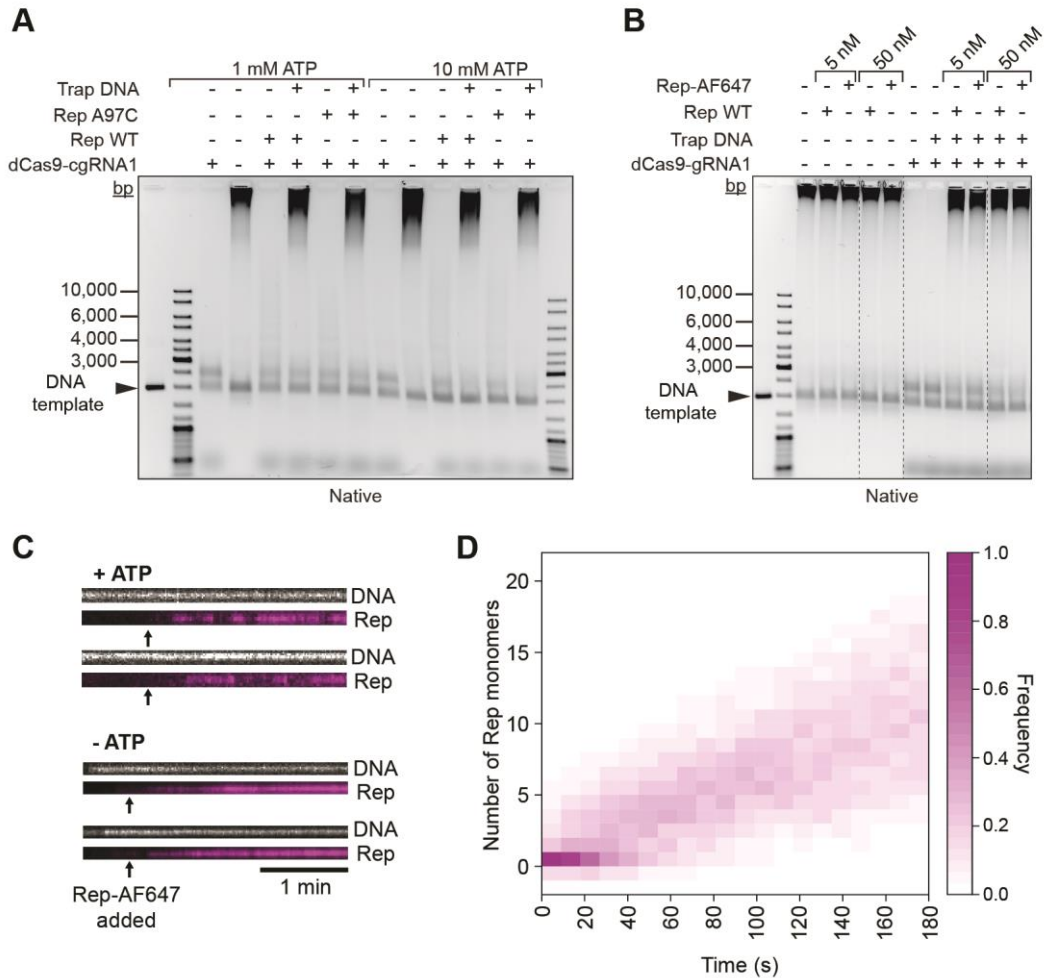

**Supplementary Figure S4:** Ensemble replication rescue activity tests of Rep A97C and Rep-AF647. **(A)** Rep WT and Rep A97C (50 nM) efficiently remove dCas9-cgRNA1 (50 nM) complex from DNA templates and rescue stalled DNA replication. Note that the appearance of long DNA products signifies efficient replication rescue. A 10-fold increase in ATP concentration (and 2-fold increase in  $MgCl_2$  concentration) results in a greater extent of DNA replication rescue, evident by decreased intensity of DNA band at approximately 2.5 kbp. **(B)** Rep-AF647 successfully removes the dCas9-cgRNA1 complex from DNA templates. Irrelevant lanes to the figure are cropped out (dashed lines). **(C)** Example kymographs of Rep-AF647 binding to 2-kbp rolling-circle DNA template bound by SSB and DnaBC, in the presence (top) and absence (bottom) of ATP. Arrows indicate the time point of addition of Rep-AF647 to the flow cell. **(D)** Heatmap of number of Rep-AF647 monomers bound to the DNA template over time in the absence of ATP ( $n = 70$ ).

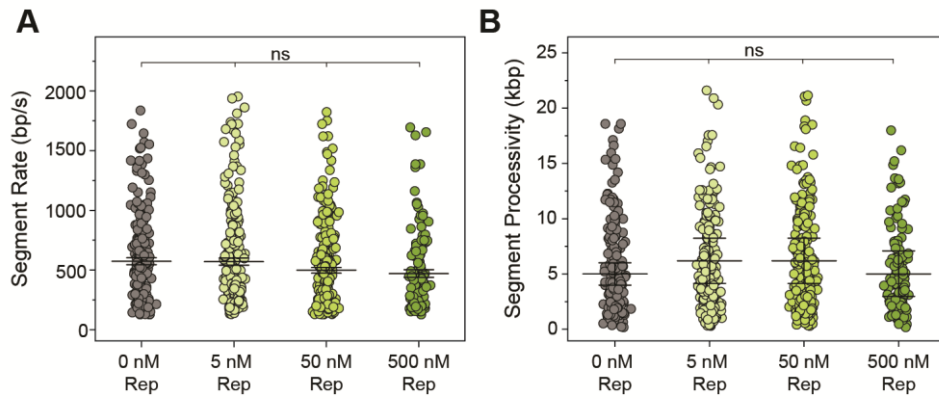

**Supplementary Figure S5:** Quantification of the effect of Rep WT on the rate and processivity of replication. **(A)** Median rates of replication in the absence (gray) ( $580 \pm 30 \text{ bp s}^{-1}$  (median  $\pm$  S.E.M.,  $n = 179$ , replication efficiency =  $5 \pm 1 \%$  (S.E.M.)) and presence of titrated Rep WT (5 nM (light green) ( $573 \pm 30 \text{ bp s}^{-1}$  ( $n = 208$ ,  $5 \pm 1\%$ ), 50 nM (olive green) ( $500 \pm 20 \text{ bp s}^{-1}$  ( $n = 234$ ,  $6 \pm 1\%$ ), and 500 nM (dark green) ( $470 \pm 30 \text{ bp s}^{-1}$  ( $n = 113$ ,  $3 \pm 1\%$ )), quantified by change-point analysis of single-molecule rolling-circle DNA replication trajectories. **(B)** Mean processivity of replication in the absence (gray) ( $5 \pm 1 \text{ kbp}$  (mean  $\pm$  S.E.M.)) and presence of titrated Rep WT (5 nM (light green) ( $6 \pm 2 \text{ kbp}$ ), 50 nM (olive green) ( $6 \pm 2 \text{ kbp}$ ), and 500 nM (dark green) ( $5 \pm 2 \text{ kbp}$ )). Mean processivities were determined from fitting a single-exponential decay function to data. Comparison of distributions was conducted using Kruskal-Wallis test for multiple comparisons with Dunn's procedure where ns indicates no significant difference ( $p > 0.05$ ).

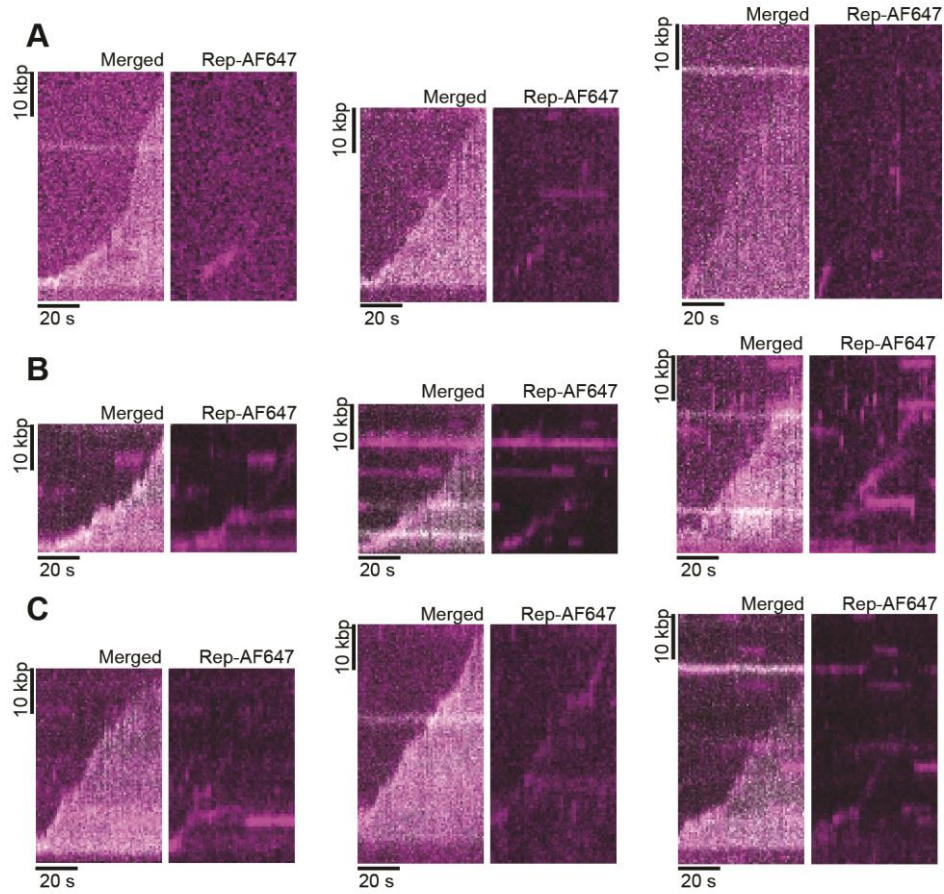

**Supplementary Figure S6:** Example kymographs of Rep-AF647 during processive rolling-circle DNA replication. Merged kymographs of Rep-AF647 intensity (magenta) and Sytox orange-stained DNA (gray) (left) and Rep-AF647 intensity alone (right). **(A)** 5 nM Rep-AF647 (replication efficiency of  $7 \pm 1\%$  (S.E.M.)). **(B)** 10 nM Rep-AF647 ( $5 \pm 1\%$ ). **(C)** 20 nM Rep-AF647 ( $4 \pm 1\%$ ).

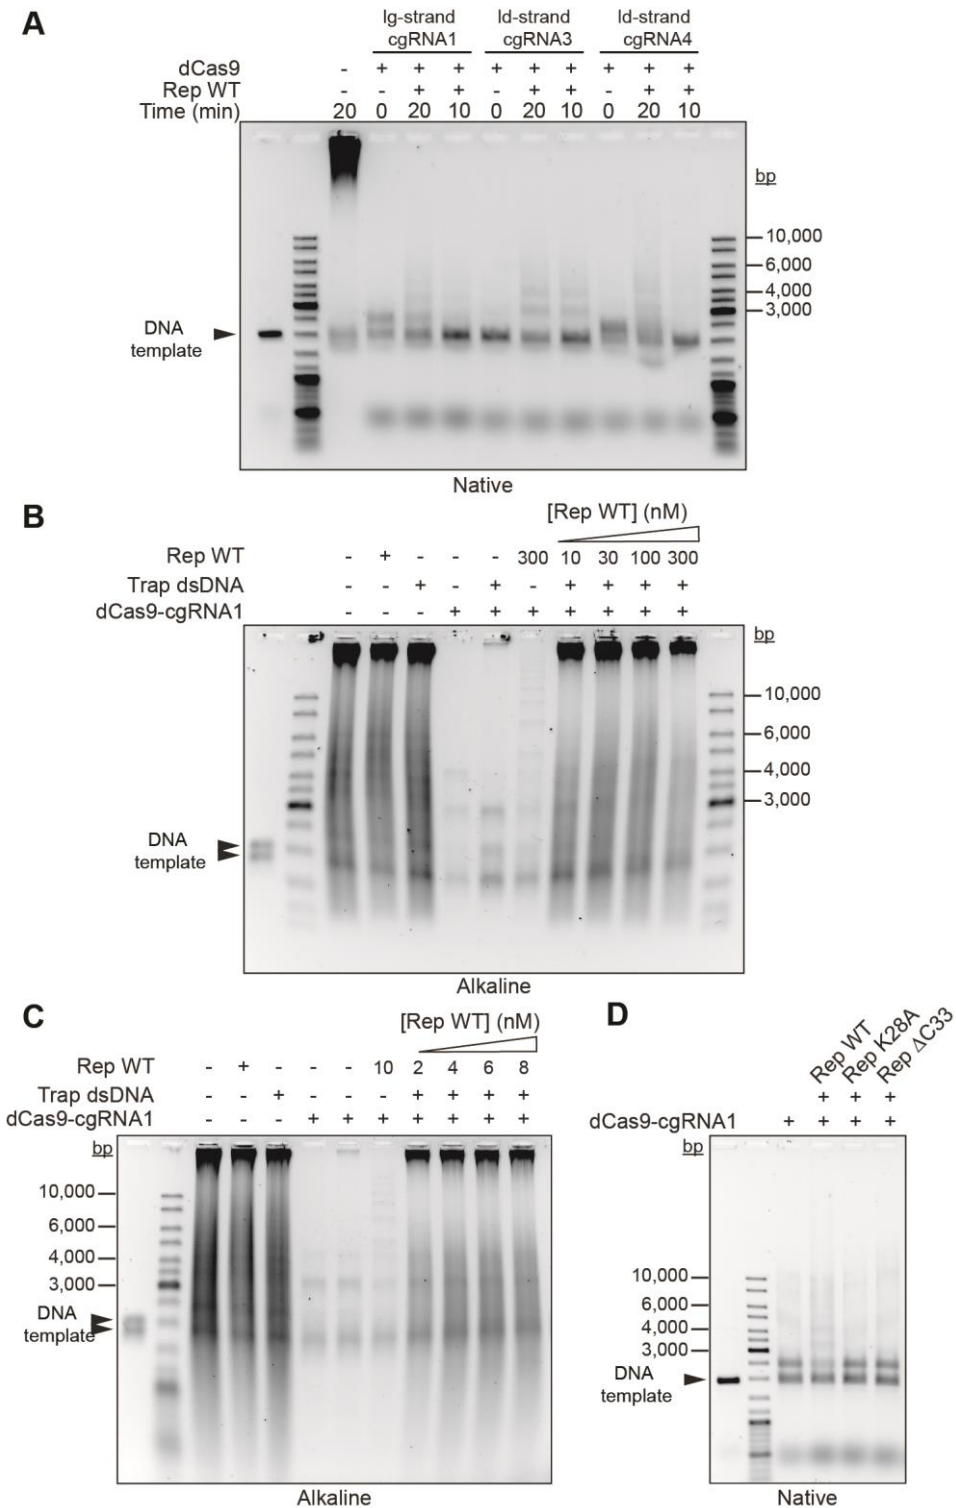

**Supplementary Figure S7:** Rep rescues DNA replication stalled by dCas9-cgRNA complexes. Reactions contained 200 nM of specified cgRNA and 50 nM dCas9 complex. **(A)** Rep WT rescues stalled DNA replication independent of the DNA strand targeted by the dCas9-cgRNA complex. Rep WT was added to reactions at the 10 min time point.  $N > 2$  independent experiments. **(B)** Titration of Rep WT (10–300 nM). Addition of trap dsDNA results in higher extent of rescued DNA products.  $N > 2$  independent experiments. **(C)** Titration of Rep WT (2–8 nM).  $N > 2$  independent experiments. **(D)** Rep



mutants lacking either the C-terminal domain ( $\Delta$ C33) or functional ATPase (K28A) cannot rescue dCas9-gRNA1 stalled DNA replication.  $N > 2$  independent experiments.

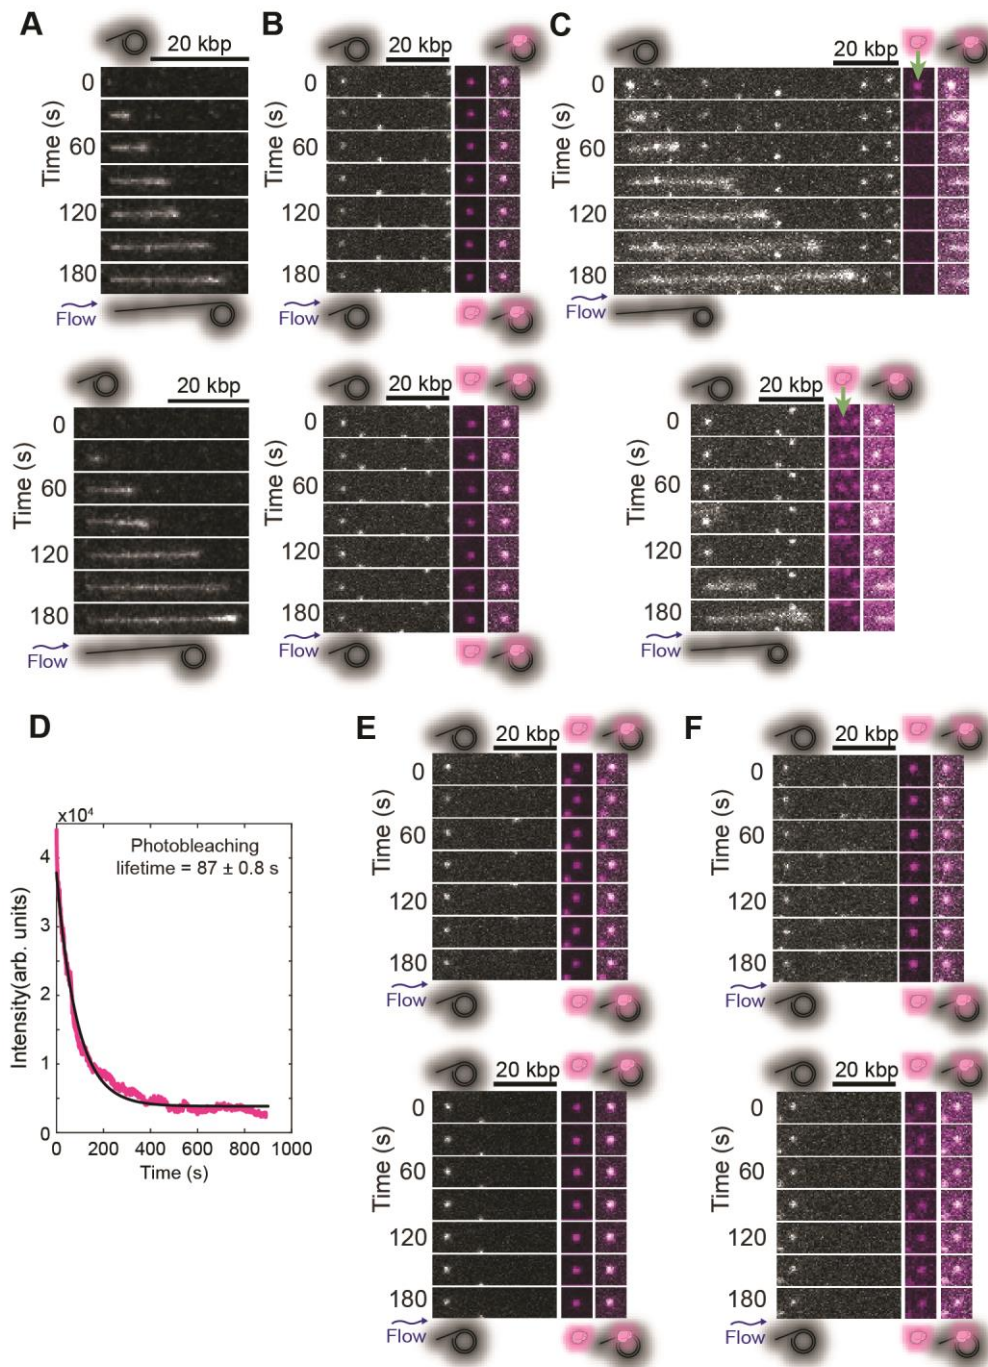

**Supplementary Figure S8:** Additional example montages of replication rescue of DNA templates (Sytox orange stained; gray scale) pre-incubated with dCas9-gRNA1-Atto647 (magenta) complexes. **(A)** In the absence of dCas9-gRNA1 complexes. **(B)** Pre-incubation of the DNA template with dCas9-gRNA1-Atto647. **(C)** Addition of Rep WT (20 nM) results in disappearance of dCas9-gRNA1-Atto647 (green arrow). **(D)** Average photo-bleaching trajectory for dCas9-gRNA1-Atto647 ( $n = 139$ ) at excitation power density of  $200 \text{ mW cm}^{-2}$ , imaged every 200 ms. Single-exponential decay fit (black

line) revealed a photo-bleaching lifetime of  $87 \pm 1$  s. **(E)** Rep K28A and **(F)** Rep  $\Delta$ C33 cannot remove dCas9-cgRNA1-Atto647 complexes.

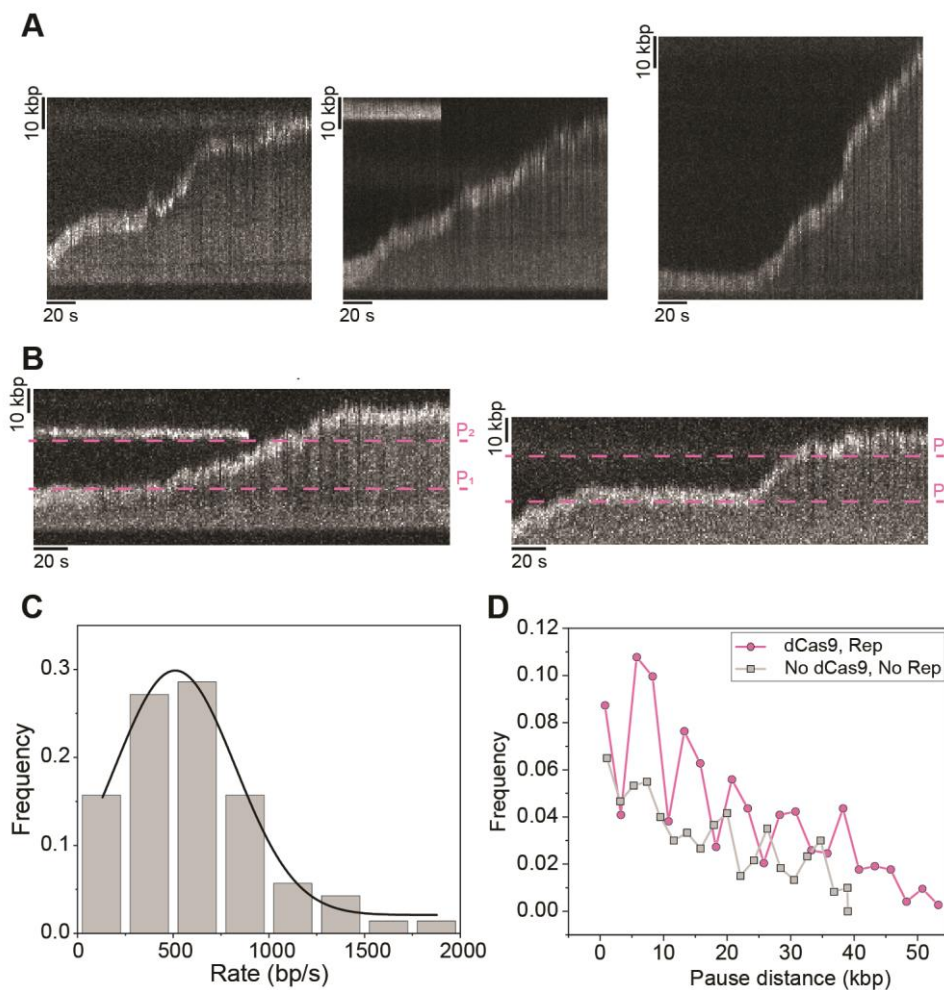

**Supplementary Figure S9:** Single-molecule rolling-circle DNA replication of an 18-kbp DNA template. **(A)** Three example kymographs of elongating DNA replication of Sytox orange-stained 18-kbp rolling-circle DNA template (gray) ( $n = 32$  molecules; replication efficiency of  $7 \pm 1\%$  (S.E.M.)). Large circle of template is resolved at the tip of the replicating molecule at a higher intensity as it is stretched out by flow. **(B)** Two example kymographs of elongating DNA replication showing multiple pausing and rescue events by dCas9-cgRNA1 (0.25 nM) and Rep WT (10 nM) in solution ( $n = 26$  molecules;  $3 \pm 1\%$ ). The dashed lines (magenta) indicate the theoretical pause start sites at approximately 17 kbp ( $P_1$ ) and 36 kbp ( $P_2$ ). **(C)** Histograms of the rate of replication for 18-kbp rolling-circle DNA templates ( $520 \pm 130$  bp  $s^{-1}$ ,  $n = 70$ ) as in (A), fit to a Gaussian distribution. **(D)** Pairwise distance analysis of the paused start sites of 18 kbp replication rescue events in the presence of 10 nM Rep-AF647 and 0.25 nM dCas9-cgRNA1 ( $n = 37$  pauses/733 kbp) (magenta) and absence ( $n = 28$  pauses/600 kbp) (gray) for the first 60 kbp of DNA products.

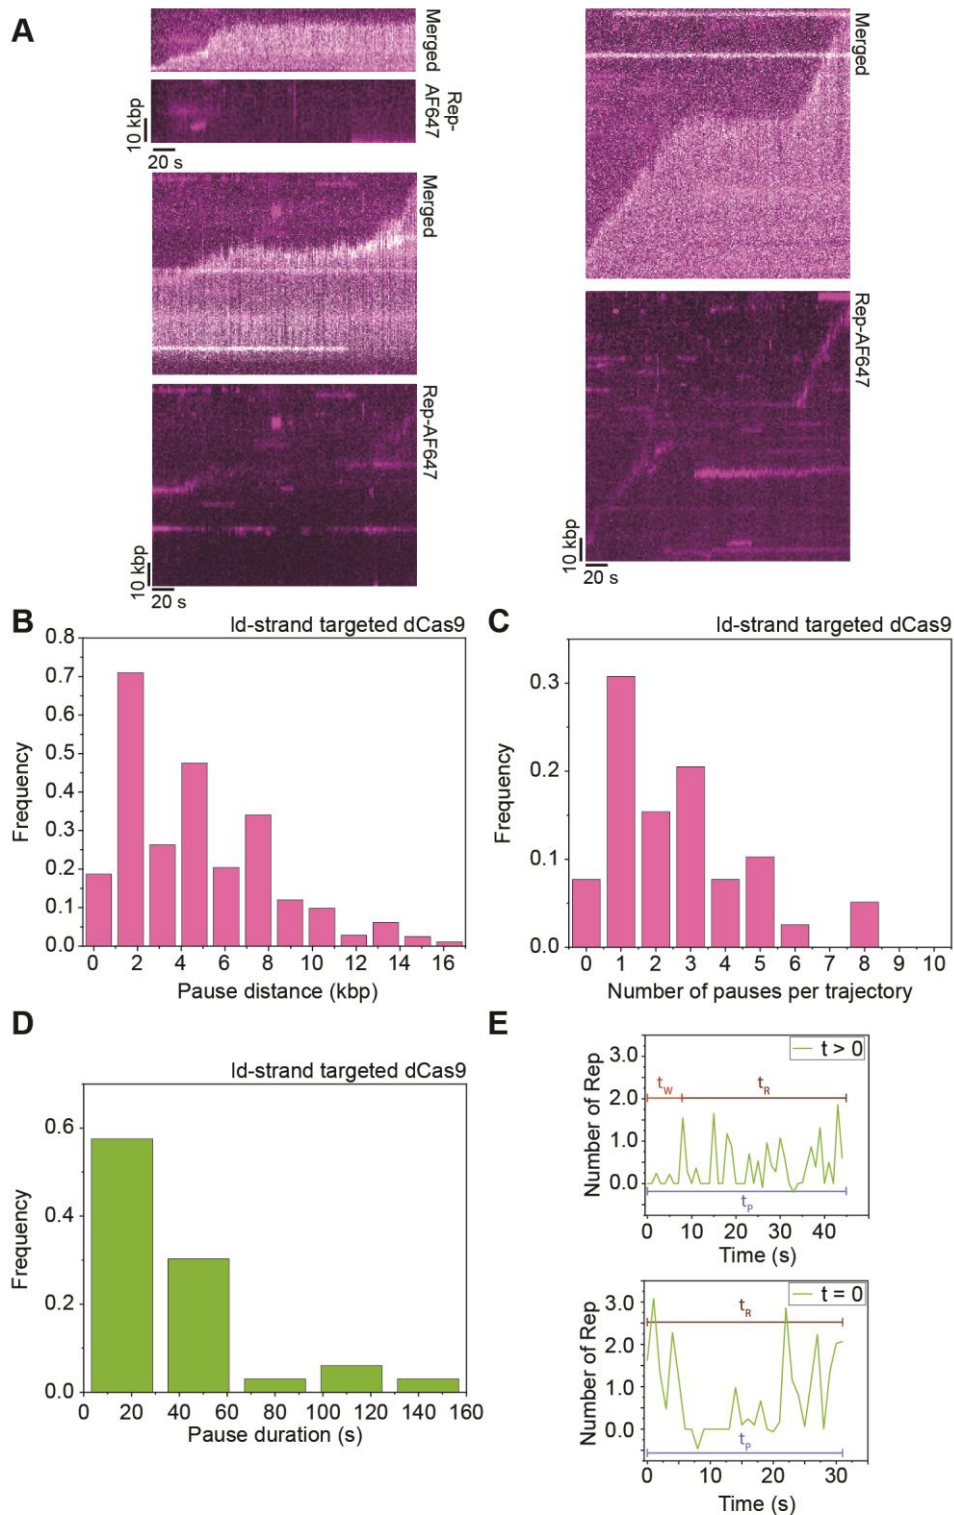

**Supplementary Figure S10:** Single-molecule replication rescue of 2-kbp rolling-circle DNA templates. **(A)** Three example kymographs of rolling-circle DNA replication pausing and rescue events in reactions containing dCas9-cgRNA1 (0.25 nM) and Rep-AF647 (10 nM). Merged kymographs of Sytox orange-stained DNA products (gray) and Rep-AF647 (magenta) (top), and Rep-AF647 intensity alone (bottom). (Replication efficiency of  $3 \pm 1\%$ ). **(B–D)** Assays containing leading-strand target dCas9-cgRNA4 complexes (0.25 nM) and Rep-AF647 (10 nM) show **(B)** periodicity of pausing and rescue events ( $n = 43$  pauses/358 kbp), **(C)** number of pausing events per replicating molecule ( $n = 40$  molecules;



replication efficiency of  $2 \pm 1\%$ ), and **(D)** mean duration of pauses of  $40 \pm 20$  s ( $n = 33$  pauses). **(E)** Annotated example of Rep-AF647 intensity traces over time showing the time points used for determining the pause duration ( $t_p$  – blue), association wait time ( $t_R$  – red) and pause resolve time ( $t_r$  – dark brown) for each Rep activity ( $t > 0$ , left;  $t = 0$ , right).

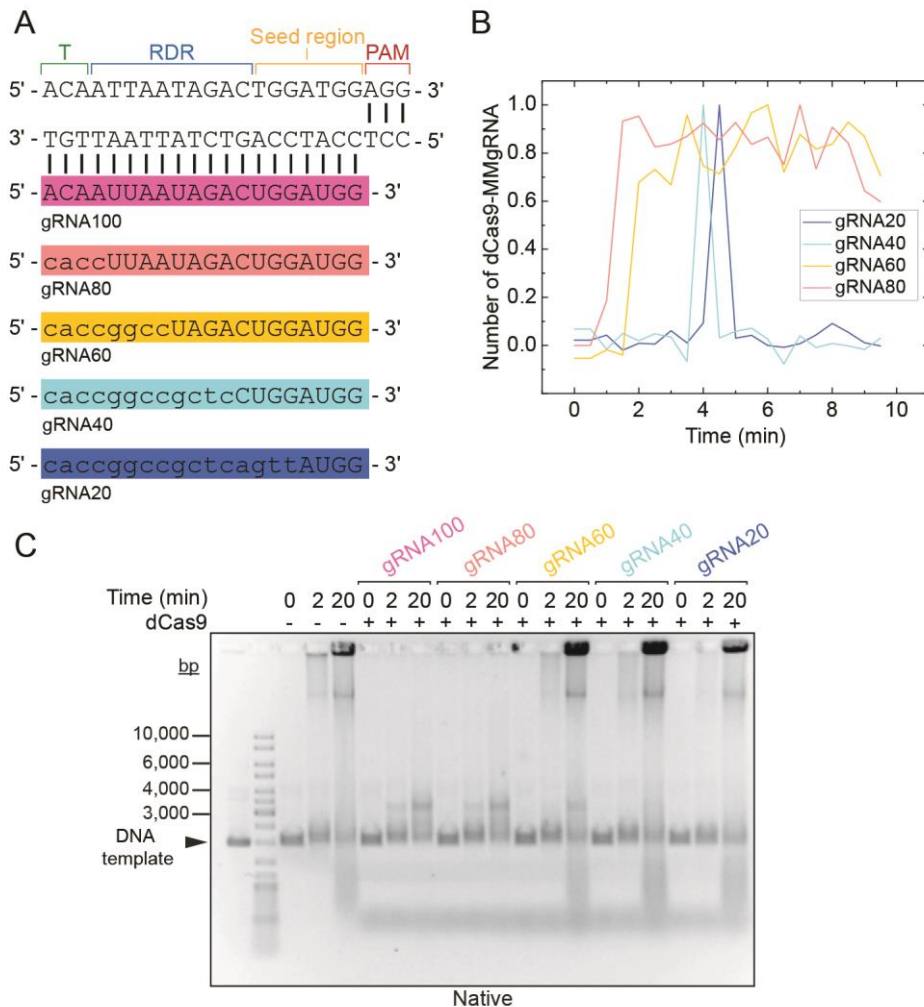

**Supplementary Figure S11: Characterization of dCas9 complexes with mismatch gRNAs. (A)** Designs of cgRNA1 and various mismatch gRNAs ranging from 80–20% complementarity to the target sequence of cgRNA1 (or gRNA100). Mismatches, denoted by lowercase letters, span across the DNA-RNA hybrid from the PAM distal region (or terminal region (T – green)), reversibility-determining region (RDR – blue), seed region (yellow) and to the PAM proximal region (red). **(B)** Example lifetime intensity trajectories of dCas9-gRNA80 (peach), dCas9-gRNA60 (yellow), dCas9-gRNA40 (light blue) and dCas9-gRNA20 (blue). Intensity is corrected for the intensity of a single dCas9-gRNA-Atto647 molecule measured by photobleaching analysis. **(C)** Time course ensemble characterization of dCas9-MMG RNA complexes blocking rolling-circle DNA replication over 20 min in the absence of Rep proteins and trap dsDNA.
